# Supplementary material
Source: PubMed Central journal article supplement (PMC4005490)
Supplement: Supp_Table1.pdf [file Supp_Table1.pdf]

## Supplementary Data

SUPPLEMENTARY TABLE S1. PRIMERS USED IN QUANTITATIVE REAL-TIME-POLYMERASE CHAIN REACTION

| <i>Marker</i> | <i>Forward primer (5'-3')</i> | <i>Reverse primer (5'-3')</i> |
|---------------|-------------------------------|-------------------------------|
| ABCG2         | AACCTGGTCTCAACGCCATC          | GTCGCGGTGCTCCATTATC           |
| $\Delta$ Np63 | TCCATGGATGATCTGGCAAGT         | GCCCTCCAGATCGCATGT            |
| N-cad         | AGCCAACCTTAACTGAGGAGT         | GGCAAGTTGATTGGAGGGATG         |
| K14           | GACCATTGAGGACCTGAGGA          | ATTGATGTCGGCTTCCACAC          |
| K12           | CCAGGTGAGGTCAGCGTAGAA         | CCTCCAGGTGCTGATGAGC           |
| Ki67          | CTTGGGTGCGACTTGACG            | GTCGACCCCGCTCCTTT             |
| GAPDH         | CGACCACTTTGTCAAGCTCA          | AGGGGTCTACATGGCAACTG          |
