# Supplementary material
Source: PubMed Central journal article supplement (PMC4005490)
Supplement: Supp_Table2.pdf [file Supp_Table2.pdf]

SUPPLEMENTARY TABLE S2. PRIMARY ANTIBODIES USED IN IMMUNOCYTOCHEMISTRY

| <i>Marker</i> | <i>Catalog no.</i>   | <i>Company</i>               | <i>Dilution</i> |
|---------------|----------------------|------------------------------|-----------------|
| P63 $\alpha$  | 4892S                | Cell Signaling               | 1:100           |
| K14           | K14 Ab (Clone LL002) | NeoMarkers/Fisher Scientific | 1:2             |
| K12           | Sc-25722             | Santa Cruz Biotechnology     | 1:100           |
